# Supplementary material for: A High-Density Simple Sequence Repeat-Based Genetic Linkage Map of Switchgrass
Source: PubMed Central journal article supplement (PMC3291506; doi:10.1534/g3.111.001503), 2012-03-01
Supplement: supp_2.3.357_001503SI.pdf [file supp_2.3.357_001503SI.pdf]

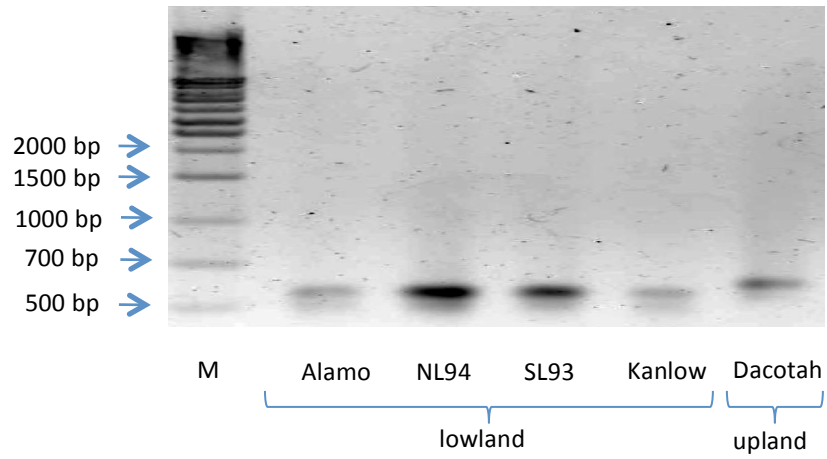

**Figure S1** Detection of 49 bp deletion in *trnL-UAA* intron in lowland and upland switchgrass. Alamo and Kanlow represented the southern and northern lowland ecotypes, respectively. While Dacotah represented a typical upland ecotype. "M" indicated the molecular weight standard with 1 kb DNA Ladder (Axygen Biosciences, Union City, CA)

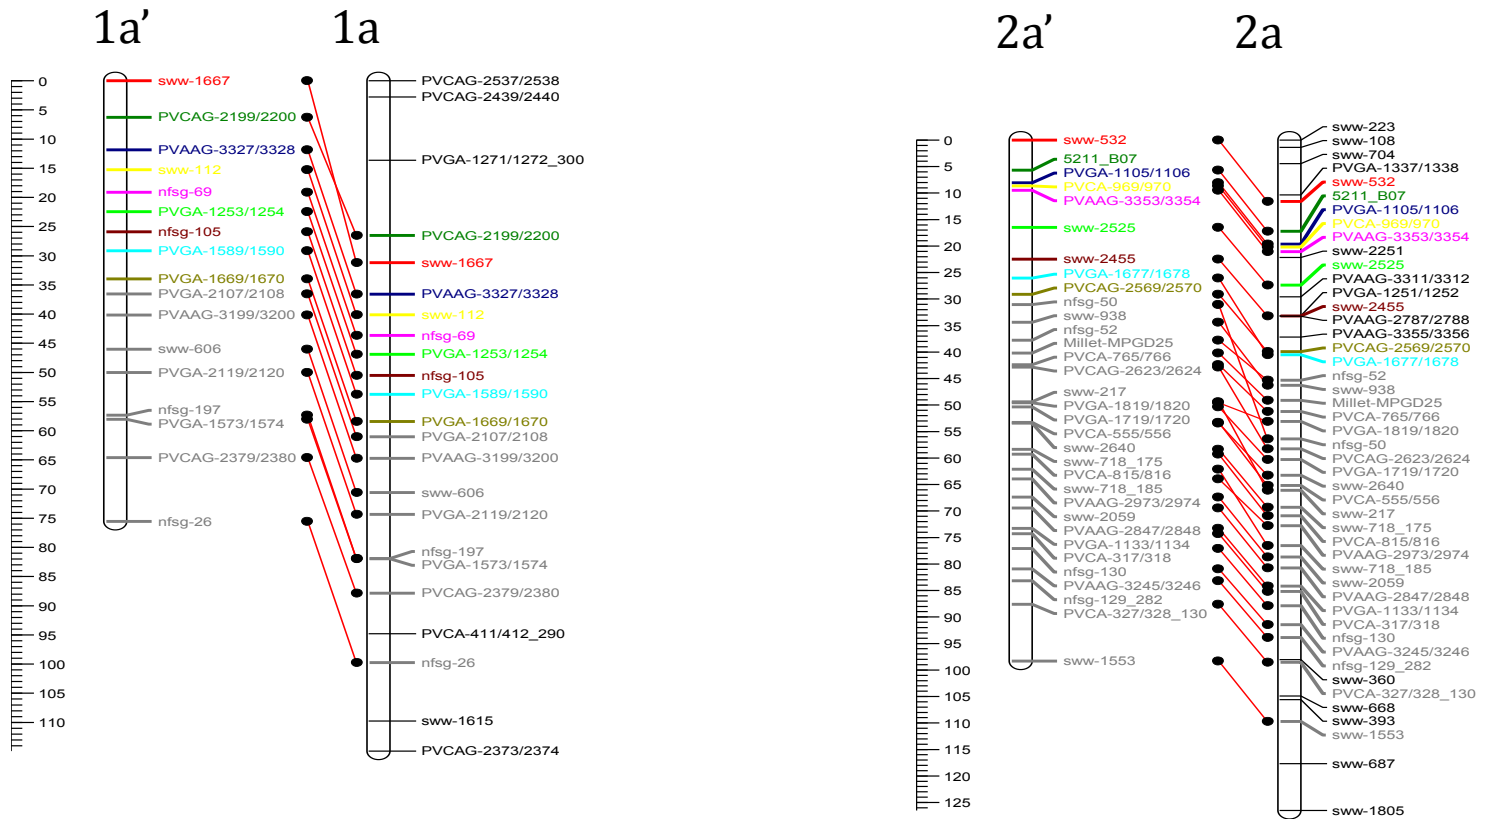

**Figure S2** Collinerity between the initial and final framework linkage maps. Here only linkage groups (LGs) 1a and 2a are shown as the representatives of all LGs. The LG number of initial framework map is indicated by a quote symbol. All loci mapped with the same markers across LGs are highlighted with matching colors

Figure S3

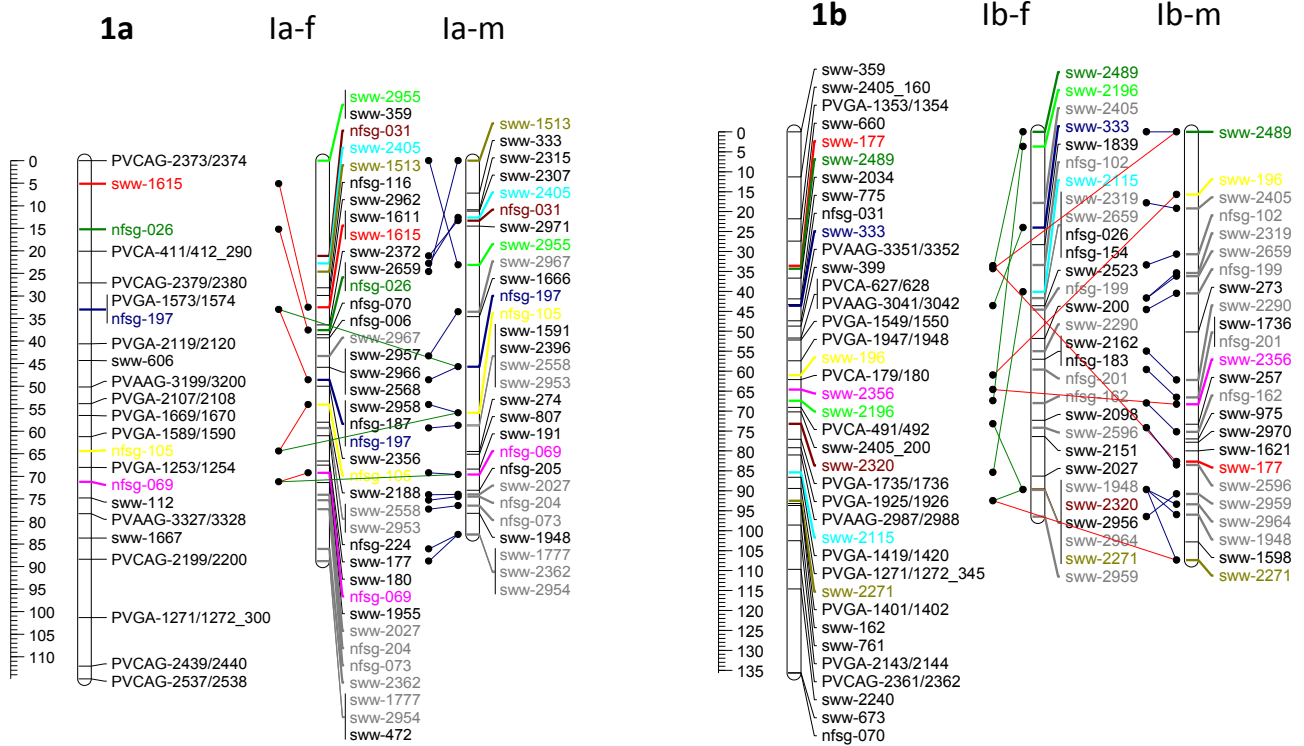

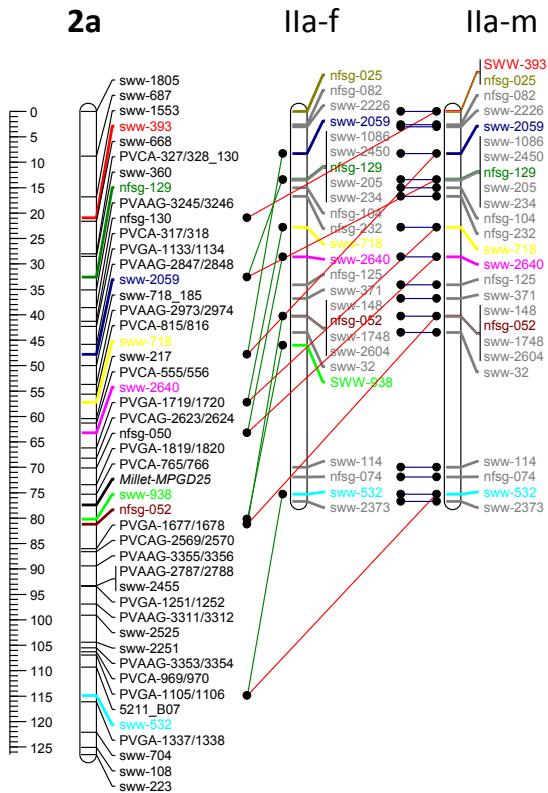

Figure S3-Continued

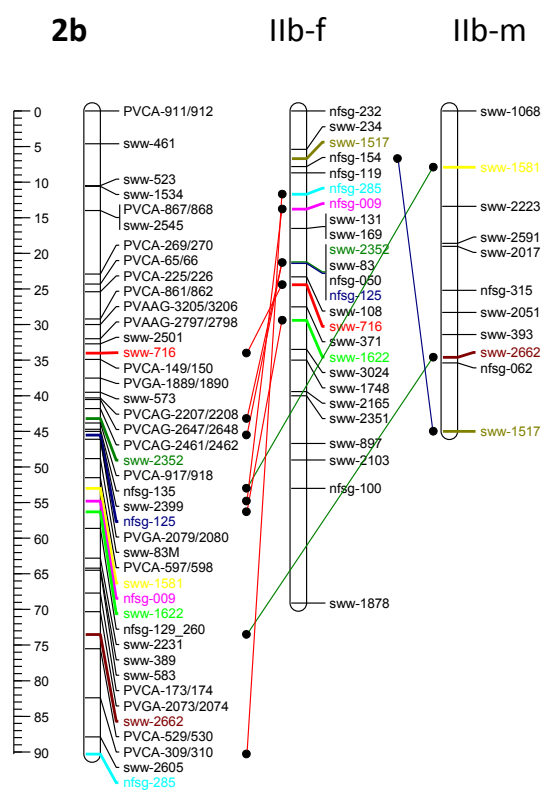

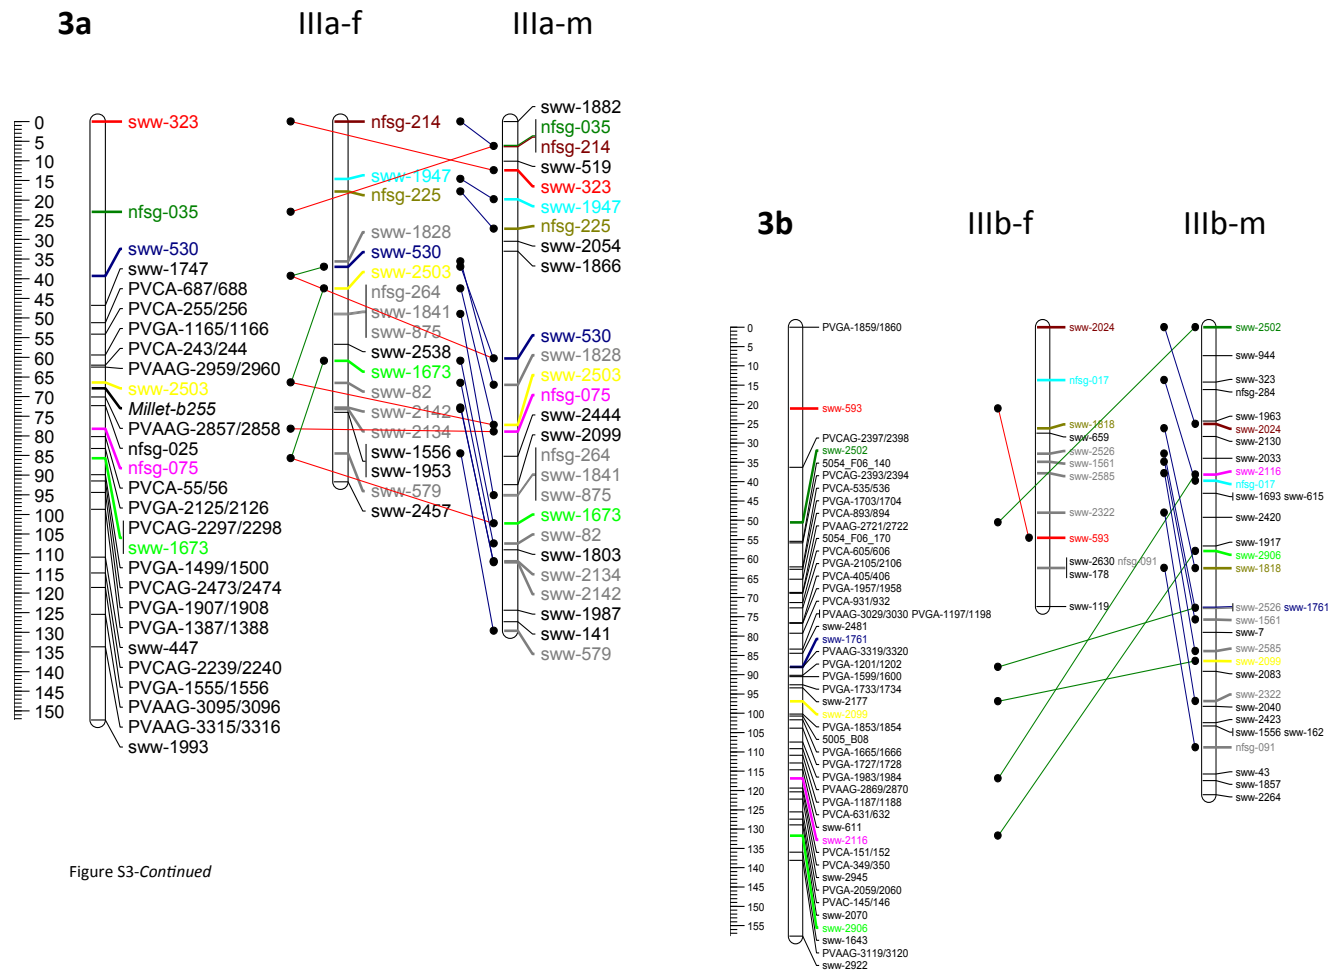

Figure S3-Continued

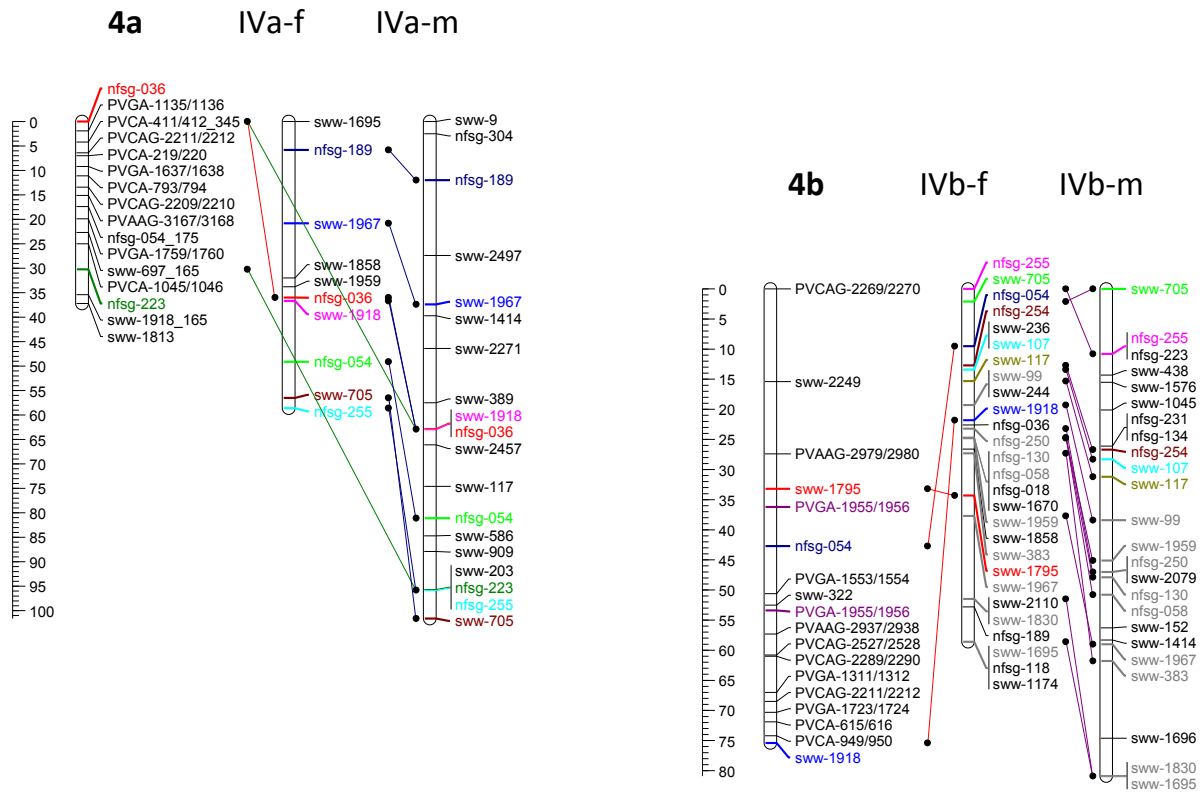

Figure S3-Continued

5a

Va-f

Va-m

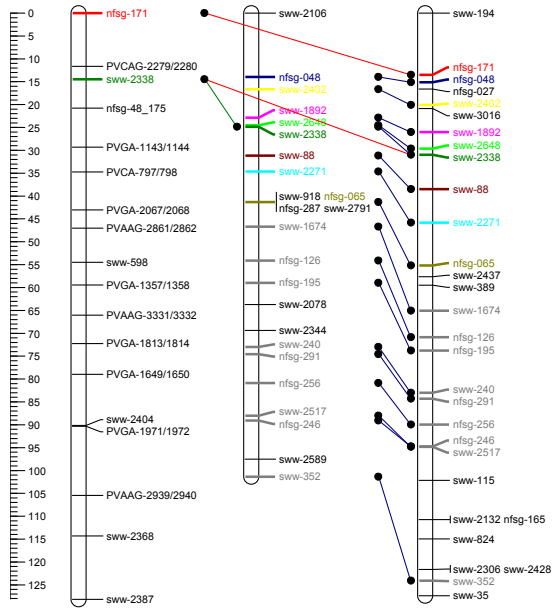

Figure S3-Continued

5b

Vb-f

Vb-m

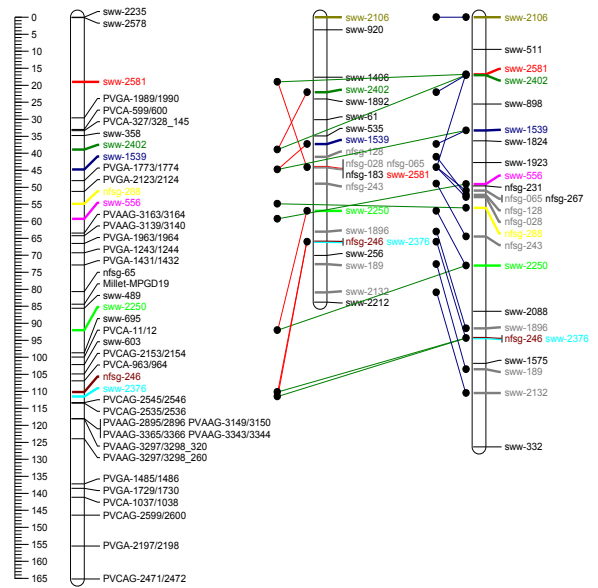

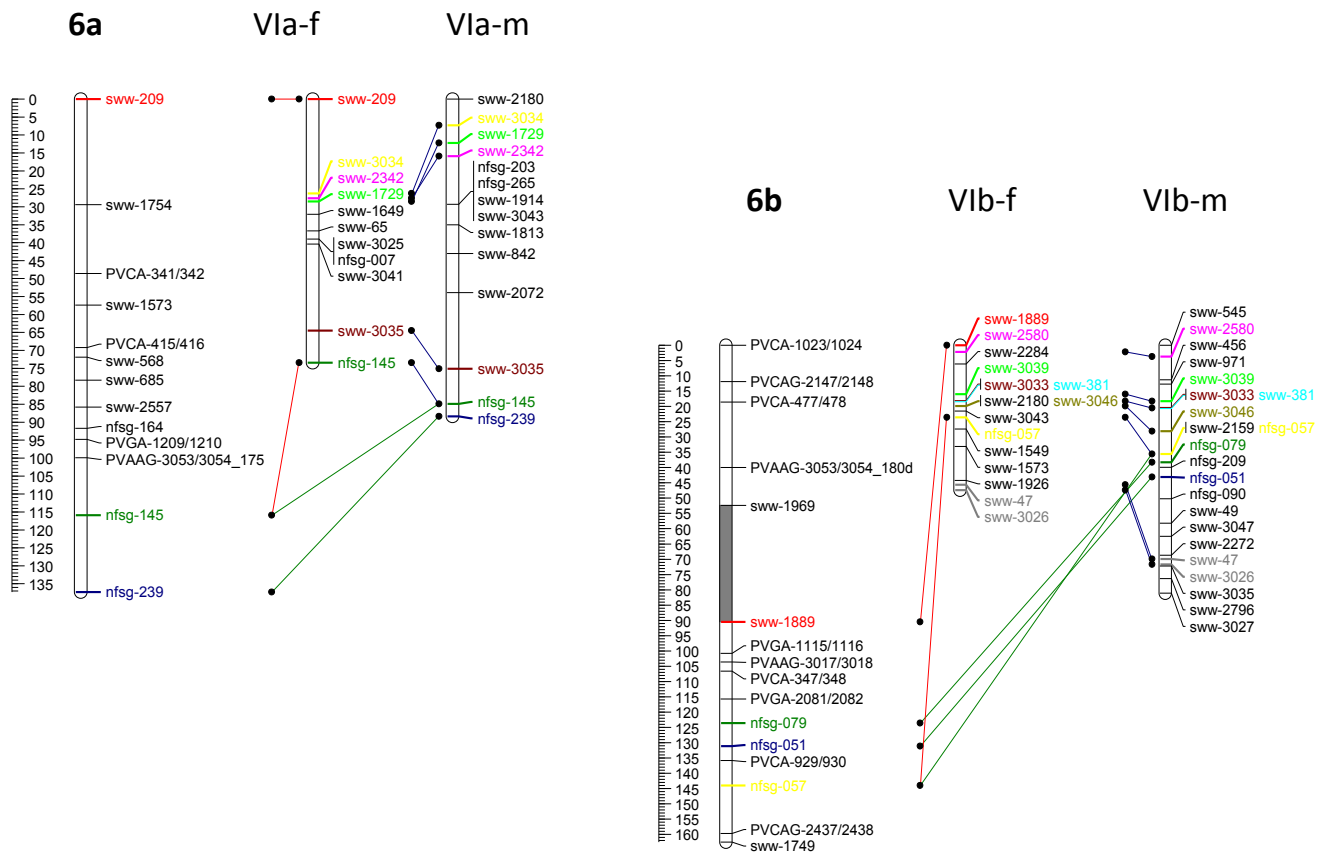

Figure S3-Continued







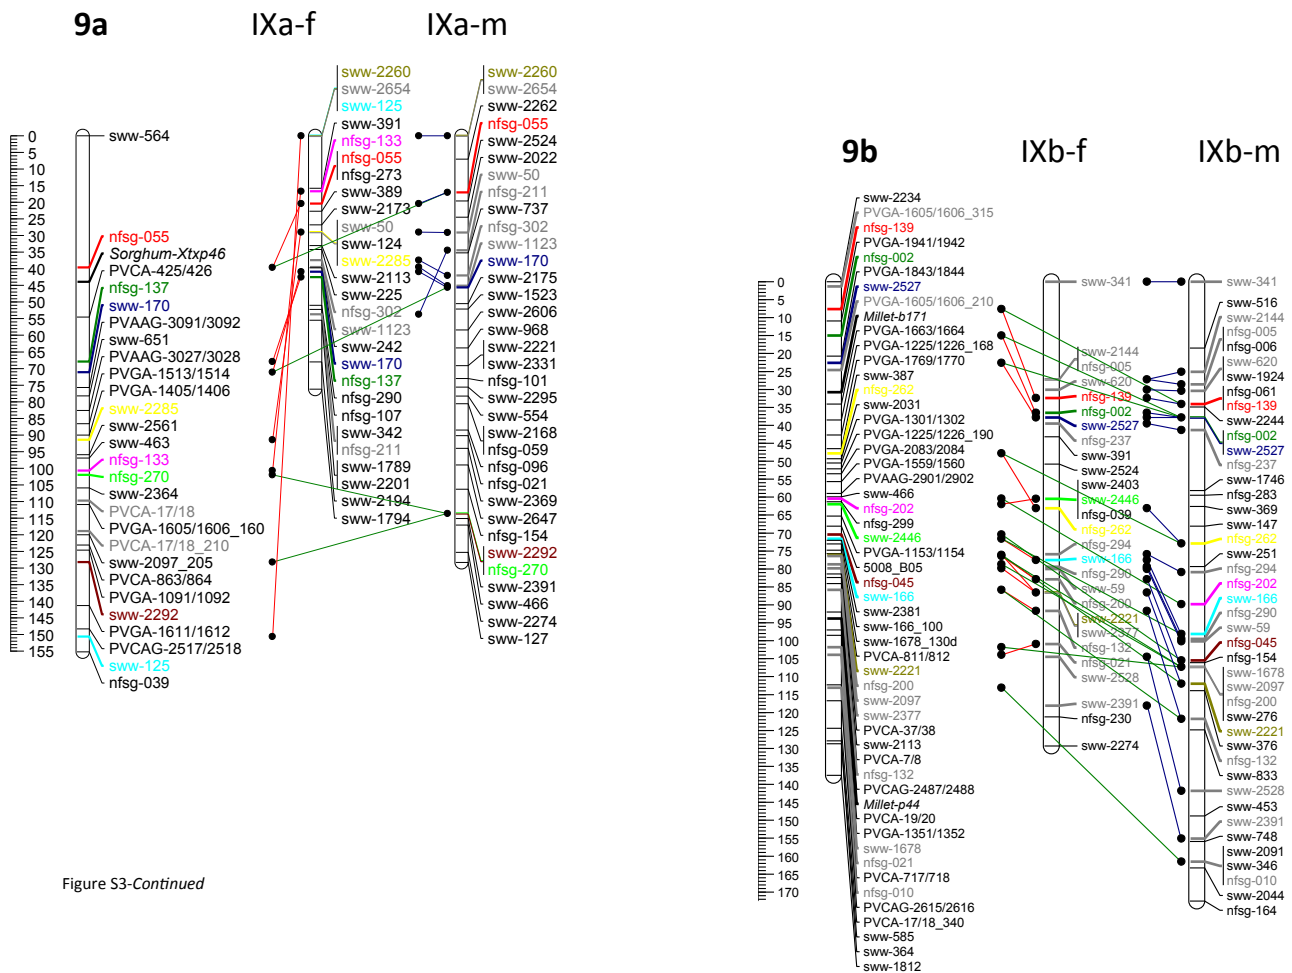

Figure S3-Continued

**Figure S3** Collinearity between this and published linkage map (Okada *et al.* 2010). The names of linkage groups (LGs) in this study are indicated with Arabic numbers in bold, and the designation of LGs and two subgenomes ('a' and 'b') is consistent with the reference map (Okada *et al.* 2010). The letter 'f' and 'm' at the end of reference LGs (Roman number) denotes female and male parent maps, respectively. To compare the two maps, the duplicated loci amplified from same markers in reference map and the band sizes were removed. All loci mapped with the same markers across LGs are highlighted with matching colors.

**File S1**

**Raw Genotyping Data**

File S1 is available for download at <http://www.g3journal.org/lookup/suppl/doi:10.1534/g3.111.001503/-/DC1>.

**Table S1 Expected progeny phenotypes and segregation ratios for disomic and tetrasomic inheritance in a selfed population of a tetraploid switchgrass plant**

| Inheritance mode | Marker scoring types | Genotypes of two bands observed <sup>a</sup> | Theoretical genotypes of selfed progeny <sup>b</sup> | Expected selfed progeny band pattern | Expected progeny ratio |
|------------------|----------------------|----------------------------------------------|------------------------------------------------------|--------------------------------------|------------------------|
| Disomic          |                      | <i>AB</i>                                    | <i>1AA, 2AB, 1BB</i>                                 | a:ab:b                               | 1:2:1                  |
| Tetrasomic       | co-dominant          | <i>ABBB</i>                                  | <i>(1AABB,2ABBB),1BBBB</i>                           | ab:b                                 | 3:1                    |
|                  |                      | <i>AABB</i>                                  | <i>1AAAA,(8AAAAB,18AABB,8ABBB),1BBBB</i>             | a:ab:b                               | 1:34:1                 |
|                  |                      | <i>AAAB</i>                                  | <i>1AAAA,(2AAAAB,1AABB)</i>                          | a:ab                                 | 1:3                    |
| Disomic          |                      | <i>A_</i>                                    | <i>(1AA, 2A_ ), 1_ _</i>                             | presence:absence                     | 3:1                    |
| Tetrasomic       | dominant             | <i>A_ _ _</i>                                | <i>(1AA_ _ ,2A_ _ _ ),1_ _ _ _</i>                   | presence:absence                     | 3:1                    |
|                  |                      | <i>AA_ _</i>                                 | <i>(1AAAA,8AAA_ ,18AA_ _ ,8A_ _ _ ),1_ _ _ _</i>     | presence:absence                     | 35:1                   |
|                  |                      | <i>AAA_</i>                                  | <i>(1AAAA,2AAA_ ,1AA_ _ )</i>                        | presence:absence                     | all presence           |

<sup>a</sup> Italicized capital letters represent genotypes.

<sup>b</sup> The genotypes in parenthesis produce the same gel banding phenotypes.

**Table S2 Detection of redundancy among published primers (Tobias *et al.* 2006, 2008; Wang *et al.* 2011) using bl2seq basic local alignment search tool (BLAST) (NCBI, Bethesda, MD)**

| Marker ID of Wang <i>et al.</i> (2011) | Marker ID of Okada <i>et al.</i> (2010) | SSR type | % Read (similarity) | Read length (bp) | E value  | Bit score <sup>b</sup> |
|----------------------------------------|-----------------------------------------|----------|---------------------|------------------|----------|------------------------|
| PVGA-1225/1226                         | NFSG005                                 | gSSR     | 100                 | 21               | 9.00E-08 | 39.9                   |
| PVGA-1901/1902                         | NFSG006                                 | gSSR     | 100                 | 22               | 6.00E-08 | 41.7                   |
| PVGA-1643/1644                         | NFSG066                                 | gSSR     | 100                 | 21               | 4.00E-09 | 39.9                   |
| PVGA-1419/1420                         | NFSG102                                 | gSSR     | 100                 | 20               | 2.00E-10 | 38.1                   |
| PVGA2-1329/1330                        | NFSG136                                 | gSSR     | 100                 | 20               | 7.00E-09 | 38.1                   |
|                                        | NFSG249                                 | gSSR     | 100                 | 20               | 5.00E-08 | 39.9                   |
| PVGA-1669/1670                         | NFSG187                                 | gSSR     | 100                 | 21               | 4.00E-08 | 39.9                   |
| PVGA-1627/1628                         | NFSG215                                 | gSSR     | 100                 | 21               | 2.00E-09 | 38.9                   |
| PVGA-1657/1658                         | NFSG243                                 | gSSR     | 100                 | 21               | 1.00E-08 | 30.7                   |
| PVGA-1867/1868                         | SWW2864                                 | eSSR     | 100                 | 20               | 2.30E-08 | 39.9                   |
| PVGA-2035/2036                         | SWW2881                                 | eSSR     | 100                 | 21               | 4.00E-08 | 39.9                   |
| PVGA-1295/1296                         | SWW2954                                 | eSSR     | 100                 | 21               | 7.00E-09 | 38.8                   |
| PVCAG-2245/2246                        | SWW3033                                 | eSSR     | 100                 | 21               | 2.10E-09 | 30.7                   |
| PVGA6-1793/1794                        | SWW2839                                 | eSSR     | 76                  | 16               | 4.00E-06 | 38.8                   |
| PVGA5-1697/1698                        | sww2845                                 | eSSR     | 100                 | 21               | 1.41E-09 | 38.8                   |
| PVCA- 985/986                          | SWW3043                                 | eSSR     | 100                 | 18               | 8.10E-07 | 38.1                   |
| sww1 <sup>a</sup>                      | 4821_A04                                | eSSR     | 100                 | 20               | 2.00E-09 | 38.1                   |
| sww842                                 | 4934_H04                                | eSSR     | 100                 | 20               | 1.00E-09 | 38.1                   |
| SWW35                                  | No reverse sequence hit in GenBank      | eSSR     |                     |                  |          |                        |
| NFSG028                                | Redundant with NFSG027                  | gSSR     |                     |                  |          |                        |

<sup>a</sup> The last four primer pairs are the comparison of primer pairs from same research group (Tobias *et al.* 2006, 2008; Okada *et al.* 2010)

<sup>b</sup> Note the bit score represents the normalized value that can be used to compare alignment scores from different searches

**Table S3 Presentation of identical bridge markers in the linkage groups (LGs) of this map and a previous study (Okada *et al.* 2010)**

| LGs in this study | Corresponding LGs and subgenome designation of Okada <i>et al.</i> 2010 | No. of bridge markers | LGs and alternate subgenome designation of Okada <i>et al.</i> 2010 | No. of bridge markers |
|-------------------|-------------------------------------------------------------------------|-----------------------|---------------------------------------------------------------------|-----------------------|
| 1a                | Ia                                                                      | 5                     | Ib                                                                  | 0                     |
| 1b                | Ib                                                                      | 10                    | Ia                                                                  | 5                     |
| 2a                | IIa                                                                     | 8                     | IIb                                                                 | 2                     |
| 2b                | IIb                                                                     | 8                     | IIa                                                                 | 1                     |
| 3a                | IIIa                                                                    | 6                     | IIIb                                                                | 1                     |
| 3b                | IIIb                                                                    | 7                     | IIIa                                                                | 0                     |
| 4a <sup>a</sup>   | IVa                                                                     | 4                     | IVb                                                                 | 1                     |
| 4b                | IVb                                                                     | 3                     | IVa                                                                 | 2                     |
| 5a                | Va                                                                      | 3                     | Vb                                                                  | 0                     |
| 5b                | Vb                                                                      | 8                     | Va                                                                  | 2                     |
| 6a                | VIa                                                                     | 3                     | VIb                                                                 | 1                     |
| 6b                | VIb                                                                     | 4                     | VIa                                                                 | 0                     |
| 7a                | VIIa                                                                    | 4                     | VIIb                                                                | 0                     |
| 7b                | VIIb                                                                    | 0                     | VIIa                                                                | 0                     |
| 8a                | VIIIa                                                                   | 4                     | VIIIb                                                               | 0                     |
| 8b                | VIIIb                                                                   | 3                     | VIIIa                                                               | 0                     |
| 9a                | IXa                                                                     | 8                     | IXb                                                                 | 1                     |
| 9b                | IXb                                                                     | 16                    | Ixa                                                                 | 2                     |
| <b>Total</b>      |                                                                         | <b>102</b>            |                                                                     | <b>15</b>             |

<sup>a</sup>Two bridge markers (nfs-054 and sw-1918) were shared by both LG 4a and 4b.

**Table S4 A list of switchgrass markers and their corresponding nine chromosomes of foxtail millet by BlastN analysis in Phytozome v7.0**

| Chr. of foxtail millet | Switchgrass markers                                                                                                                                                                                                                                                                                                                                                                                                                                                                                                                                                                                                                                                                                                                                                                                                                           | Total |
|------------------------|-----------------------------------------------------------------------------------------------------------------------------------------------------------------------------------------------------------------------------------------------------------------------------------------------------------------------------------------------------------------------------------------------------------------------------------------------------------------------------------------------------------------------------------------------------------------------------------------------------------------------------------------------------------------------------------------------------------------------------------------------------------------------------------------------------------------------------------------------|-------|
| I                      | nfsg-026,nfsg-105,nfsg-197,PVAAG-2987/2988,PVAAG-3327/3328,PVAAG-3351/3352,PVCA-179/180,PVCA-411/412,PVCA-627/628,PVCAG-2199/2200,PVCAG-2379/2380,PVCAG-2439/2440,PVCAG-2537/2538,PVGA-1253/1254,PVGA-1271/1272,PVGA-1353/1354,PVGA-1573/1574,PVGA-1669/1670,PVGA-1735/1736,PVGA-1925/1926,PVGA-1947/1948,PVGA-2119/2120,sww-112,sww-1615,sww-162,sww-1667,sww-177,sww-196,sww-2115,sww-2196,sww-2240,sww-2271,sww-2320,sww-2405,sww-2489,sww-333,sww-359,sww-606,sww-660,sww-673                                                                                                                                                                                                                                                                                                                                                             | 40    |
| II                     | PVCA-529/530,5211_B07,Millet-MPGD25,nfsg-050,nfsg-052,nfsg-125,nfsg-129,nfsg-130,nfsg-285,PVAAG-2787/2788,PVAAG-2797/2798,PVAAG-2847/2848,PVAAG-3205/3206,PVAAG-3245/3246,PVAAG-3311/3312,PVAAG-3353/3354,PVAAG-3355/3356,PVCA-173/174,PVCA-269/270,PVCA-309/310,PVCA-317/318,PVCA-327/328,PVCA-555/556,PVCA-597/598,PVCA-765/766,PVCA-815/816,PVCA-861/862,PVCA-867/868,PVCA-911/912,PVCA-917/918,PVCA-969/970,PVCAG-2207/2208,PVCAG-2461/2462,PVCAG-2569/2570,PVCAG-2623/2624,PVGA-1105/1106,PVGA-1133/1134,PVGA-1337/1338,PVGA-1677/1678,PVGA-1719/1720,PVGA-1819/1820,PVGA-2079/2080,sww-108,sww-1553,sww-1581,sww-1622,sww-1805,sww-217,sww-223,sww-2231,sww-2251,sww-2352,sww-2455,sww-2501,sww-2525,sww-2545,sww-2640,sww-2662,sww-360,sww-389,sww-393,sww-461,sww-523,sww-532,sww-573,sww-583,sww-668,sww-704,sww-716,sww-718,sww-938 | 71    |
| III                    | 5005_B08,5054_F06,Millet-b255,nfsg-025,nfsg-035,nfsg-075,PVAAG-2721/2722,PVAAG-2869/2870,PVAAG-2959/2960,PVAAG-3095/3096,PVAAG-3119/3120,PVAAG-3315/3316,PVAAG-3319/3320,PVCA-151/152,PVCA-405/406,PVCA-55/56,PVCA-631/632,PVCA-687/688,PVCA-893/894,PVCA-931/932,PVCAG-2239/2240,PVCAG-2297/2298,PVCAG-2393/2394,PVCAG-2473/2474,PVGA-1115/1116,PVGA-1187/1188,PVGA-1197/1198,PVGA-1201/1202,PVGA-1665/1666,PVGA-1703/1704,PVGA-1727/1728,PVGA-1957/1958,PVGA-1983/1984,PVGA-2059/2060,PVGA-2105/2106,PVGA-2125/2126,sww-1643,sww-1673,sww-1761,sww-1993,sww-2070,sww-2177,sww-2481,sww-2502,sww-2503,sww-2906,sww-2922,sww-2945,sww-323,sww-447,sww-530,sww-593,sww-611                                                                                                                                                                     | 53    |
| IV                     | PVCA-1045/1046,nfsg-036,nfsg-054,PVAAG-3167/3168,PVCA-219/220,PVCA-615/616,PVCA-793/794,PVCA-949/950,PVCAG-2269/2270,PVCAG-2527/2528,PVGA-1311/1312,PVGA-1553/1554,PVGA-1637/1638,PVGA-1723/1724,PVGA-1759/1760,PVGA-1955/1956,sww-1795,sww-697                                                                                                                                                                                                                                                                                                                                                                                                                                                                                                                                                                                               | 18    |
| V                      | PVCA-1037/1038,Millet-MPGD19,nfsg-048,nfsg-065,nfsg-246,PVAAG-2861/2862,PVAAG-2895/2896,PVAAG-2939/2940,PVAAG-3139/3140,PVAAG-3149/3150,PVAAG-3331/3332,PVCA-11/12,PVCA-797/798,PVCAG-2153/2154,PVCAG-2197/2198,PVCAG-2279/2280,PVCAG-2471/2472,PVCAG-2535/2536,PVCAG-2545/2546,PVGA-1143/1144,PVGA-1243/1244,PVGA-1963/1964,PVGA-1989/1990,PVGA-2123/2124,sww-1539,sww-2235,sww-2338,sww-2368,sww-2376,sww-2387,sww-2402,sww-2404,sww-2578,sww-2581,sww-358,sww-598,sww-603                                                                                                                                                                                                                                                                                                                                                                  | 37    |
| VI                     | PVCA-1023/1024,nfsg-145,nfsg-164,nfsg-239,PVAAG-3017/3018,PVAAG-3053/3054,PVCA-341/342,PVGA-1209/1210,sww-1754,sww-1889,sww-1969,sww-209,sww-2557,sww-568,sww-685                                                                                                                                                                                                                                                                                                                                                                                                                                                                                                                                                                                                                                                                             | 16    |
| VII                    | Millet-MPGD17,PVCAG-2163/2164,PVCAG-2389/2390,PVCAG-2503/2504,PVGA-1869/1870,sww-1394,sww-1742,sww-2532                                                                                                                                                                                                                                                                                                                                                                                                                                                                                                                                                                                                                                                                                                                                       | 8     |
| VIII                   | 5048_B06,nfsg-034,nfsg-112,nfsg-219,PVAAG-2961/2962,PVAAG-3181/3182,PVCA-541/542,PVCAG-2187/2188,PVGA-1149/1150,PVGA-1275/1276,PVGA-1627/1628,sww-123,sww-1862,sww-2443                                                                                                                                                                                                                                                                                                                                                                                                                                                                                                                                                                                                                                                                       | 14    |
| IX                     | 5008_B05,Millet-b171,Millet-p44,nfsg-010,nfsg-039,nfsg-055,nfsg-132,nfsg-133,nfsg-200,nfsg-202,nfsg-262,nfsg-270,PVAAG-2901/2902,PVAAG-3027/3028,PVAAG-3091/3092,PVCA-17/18,PVCA-19/20,PVCA-37/38,PVCA-425/426,PVCA-7/8,PVCA-811/812,PVCA-863/864,PVCAG-2517/2518,PVCAG-2615/2616,PVGA-1091/1092,PVGA-1135/1136,PVGA-1153/1154,PVGA-1301/1302,PVGA-1351/1352,PVGA-1405/1406,PVGA-1513/1514,PVGA-1605/1606,PVGA-1611/1612,PVGA-1663/1664,PVGA-1843/1844,PVGA-1941/1942,PVGA-2083/2084,Sorghum-Xtxp46,sww-125,sww-166,sww-1678,sww-170,sww-1812,sww-2031,sww-2097,sww-2113,sww-2221,sww-2234,sww-2285,sww-2292,sww-2364,sww-2377,sww-2381,sww-2446,sww-2561,sww-364,sww-387,sww-463,sww-466,sww-564,sww-585,sww-651                                                                                                                             | 62    |
| Grand total            |                                                                                                                                                                                                                                                                                                                                                                                                                                                                                                                                                                                                                                                                                                                                                                                                                                               | 319   |
