# Supplementary material for: A High-Density Simple Sequence Repeat-Based Genetic Linkage Map of Switchgrass
Source: PubMed Central journal article supplement (PMC3291506; doi:10.1534/g3.111.001503), 2012-03-01
Supplement: supp_2.3.357_FigureS1.pdf [file supp_2.3.357_FigureS1.pdf]

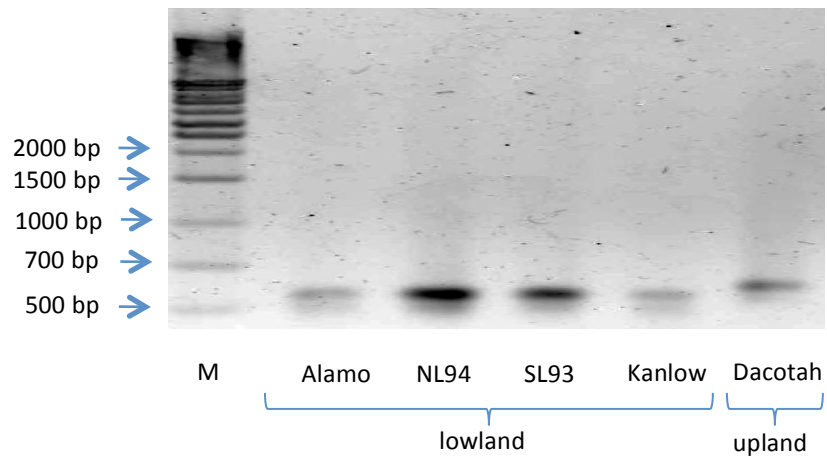

**Figure S1** Detection of 49 bp deletion in *trnL-UAA* intron in lowland and upland switchgrass. Alamo and Kanlow represented the southern and northern lowland ecotypes, respectively. While Dacotah represented a typical upland ecotype. “M” indicated the molecular weight standard with 1 kb DNA Ladder (Axygen Biosciences, Union City, CA)
