# Supplementary material for: A High-Density Simple Sequence Repeat-Based Genetic Linkage Map of Switchgrass
Source: PubMed Central journal article supplement (PMC3291506; doi:10.1534/g3.111.001503), 2012-03-01
Supplement: supp_2.3.357_FigureS3.pdf [file supp_2.3.357_FigureS3.pdf]

Figure S3

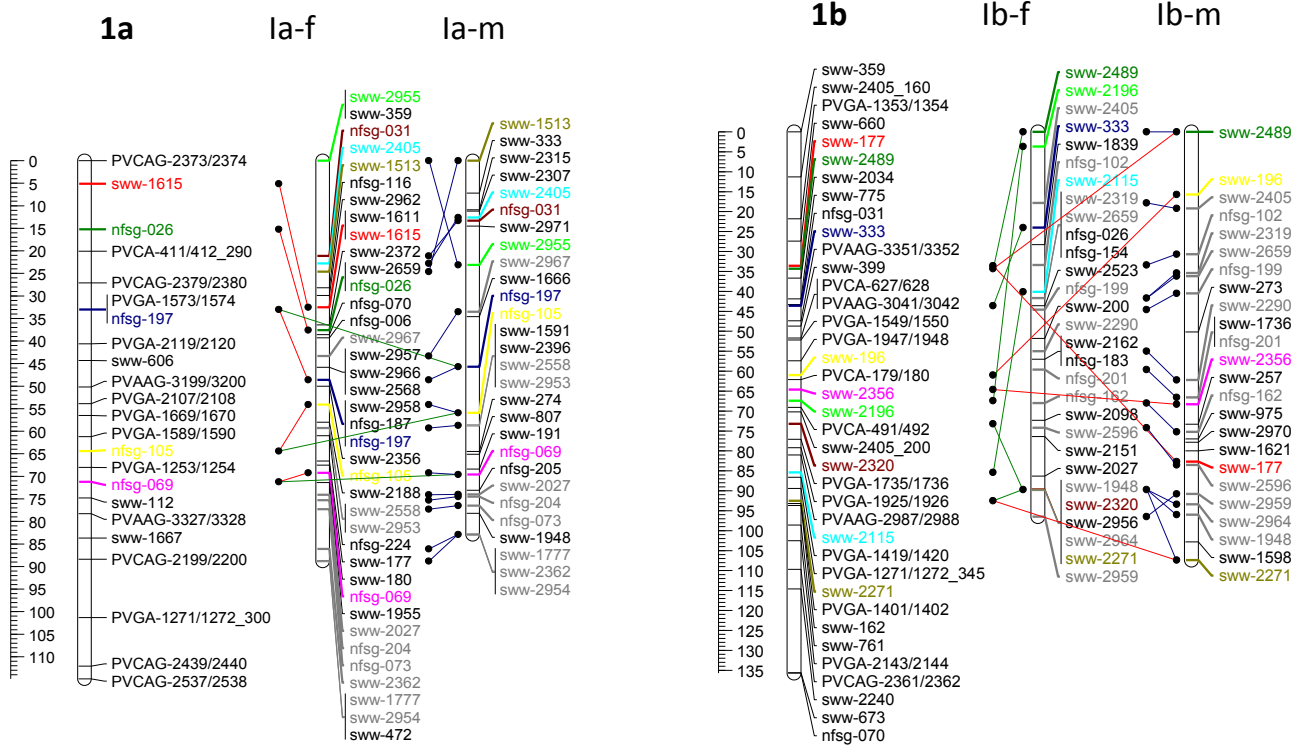

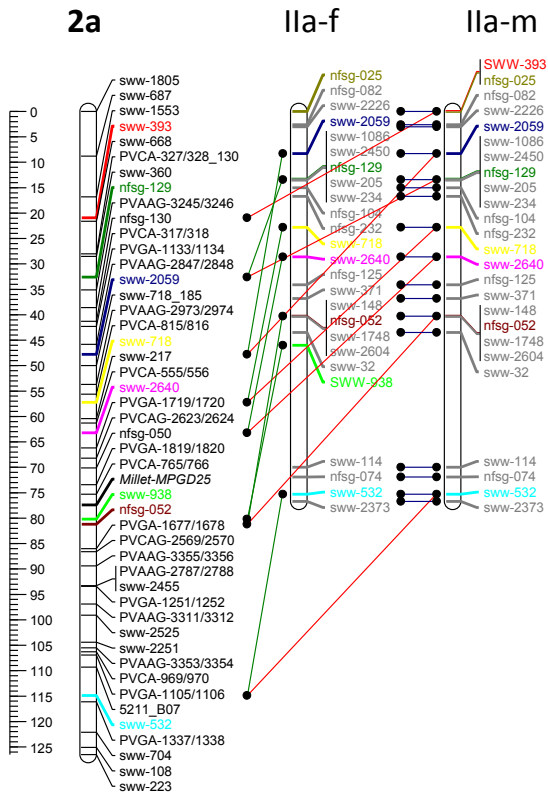

Figure S3-Continued

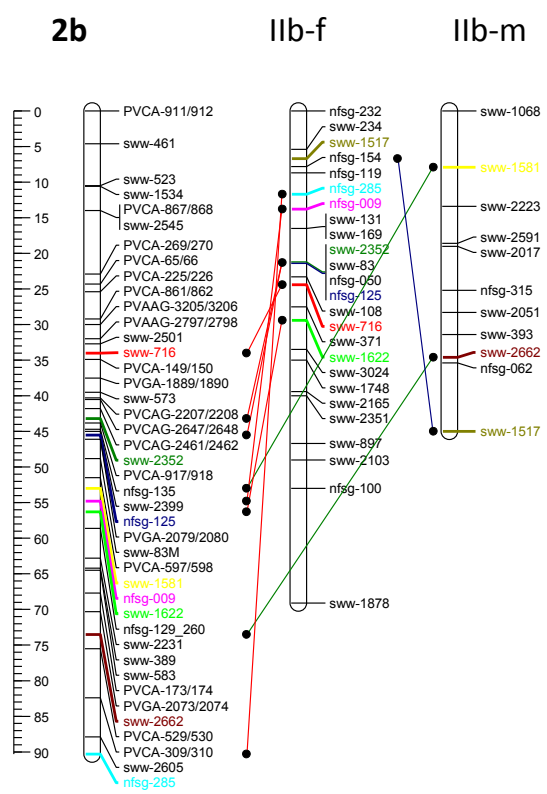

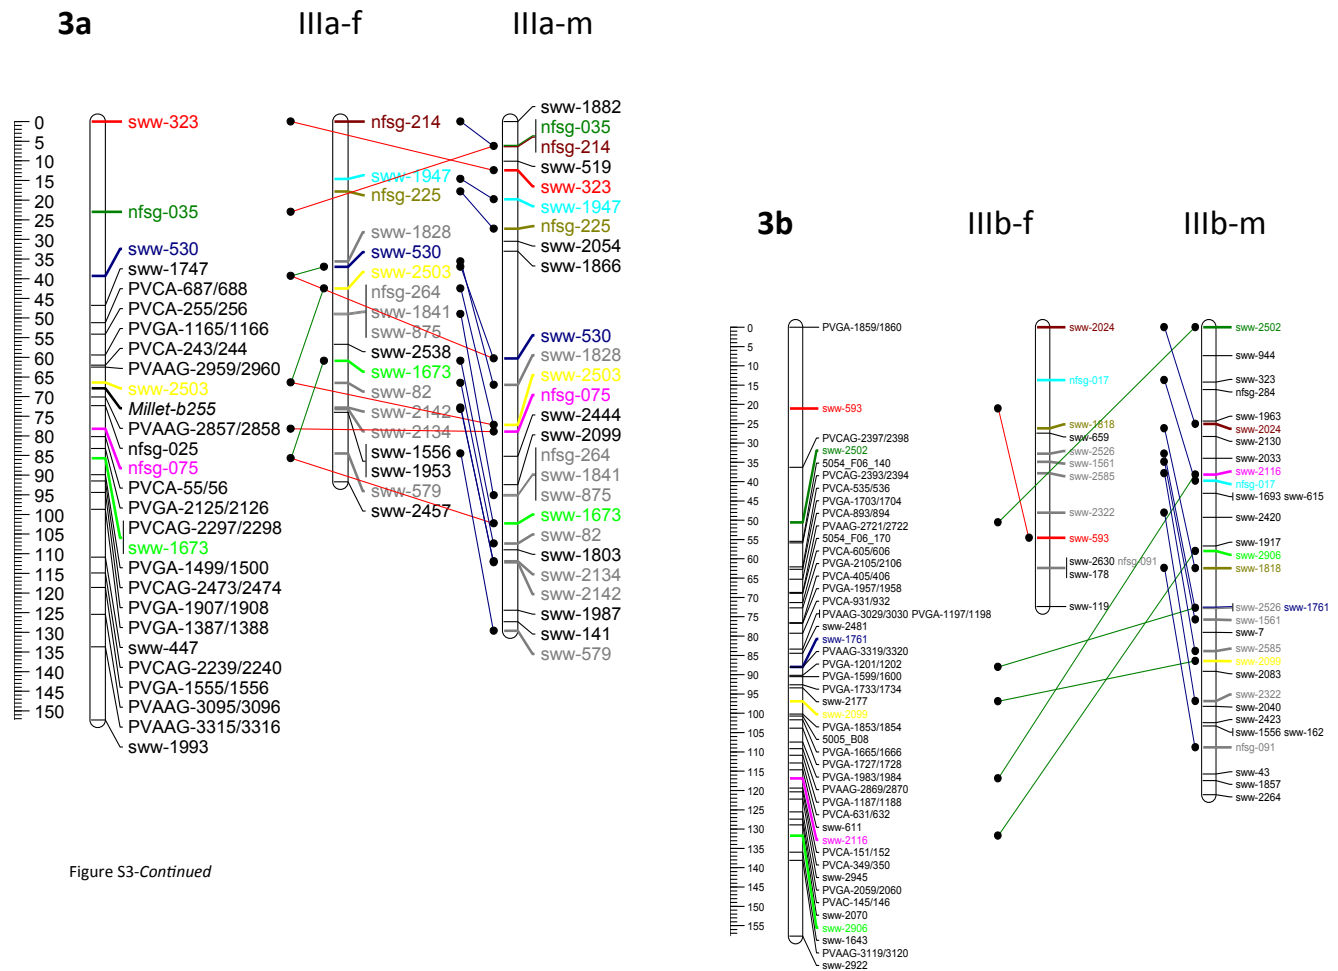

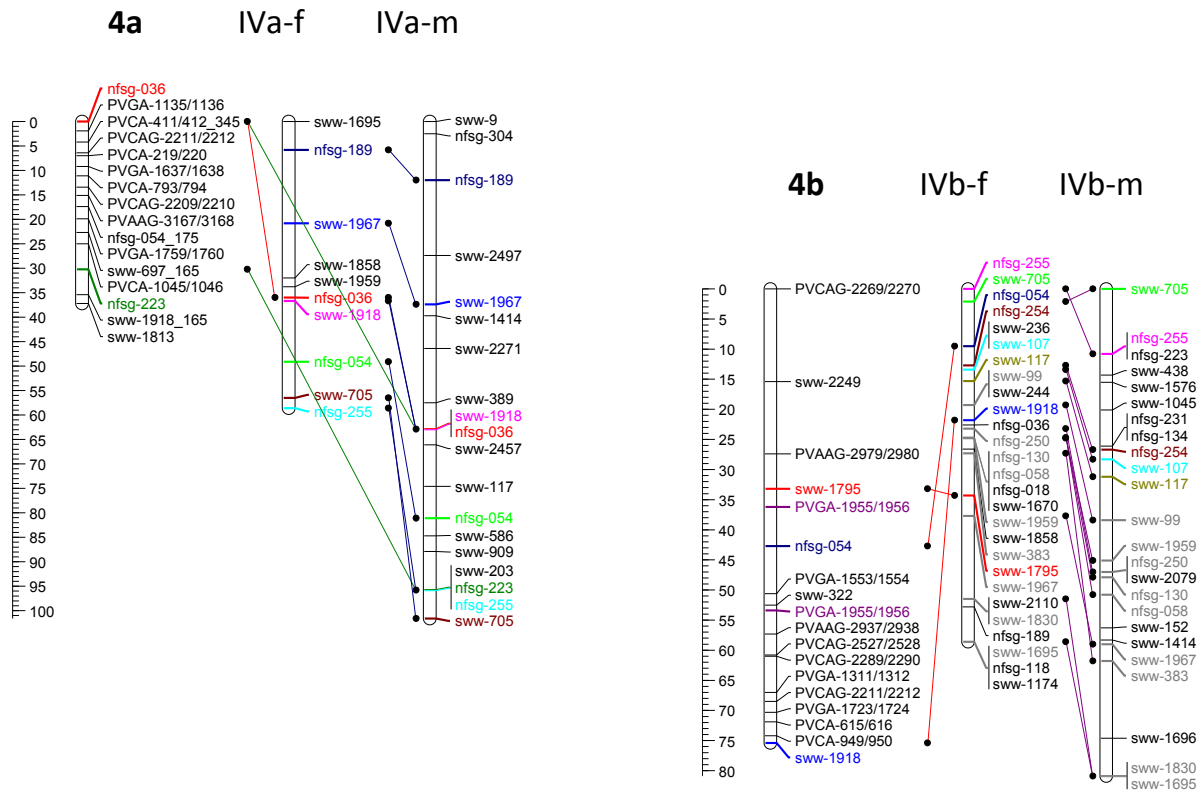

Figure S3-Continued

5a

Va-f

Va-m

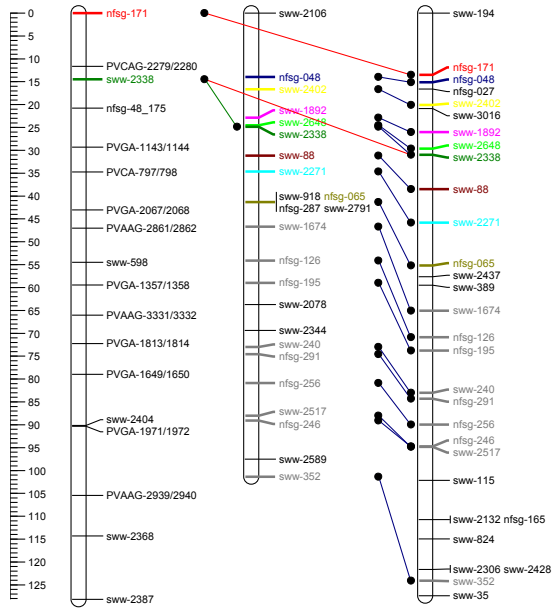

5b

Vb-f

Vb-m

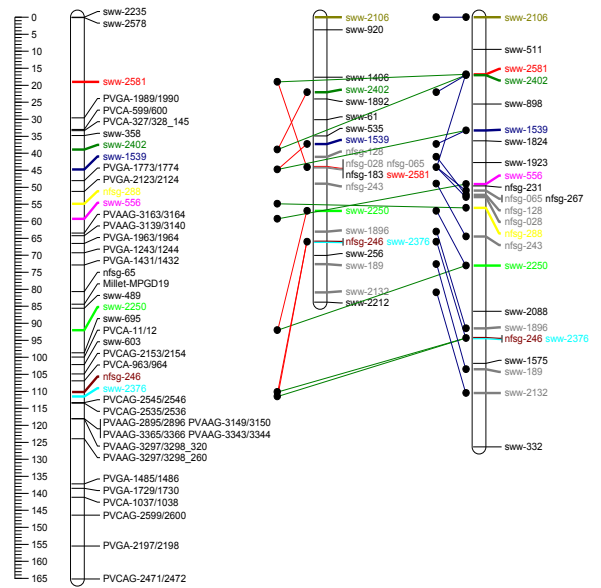

Figure S3-Continued

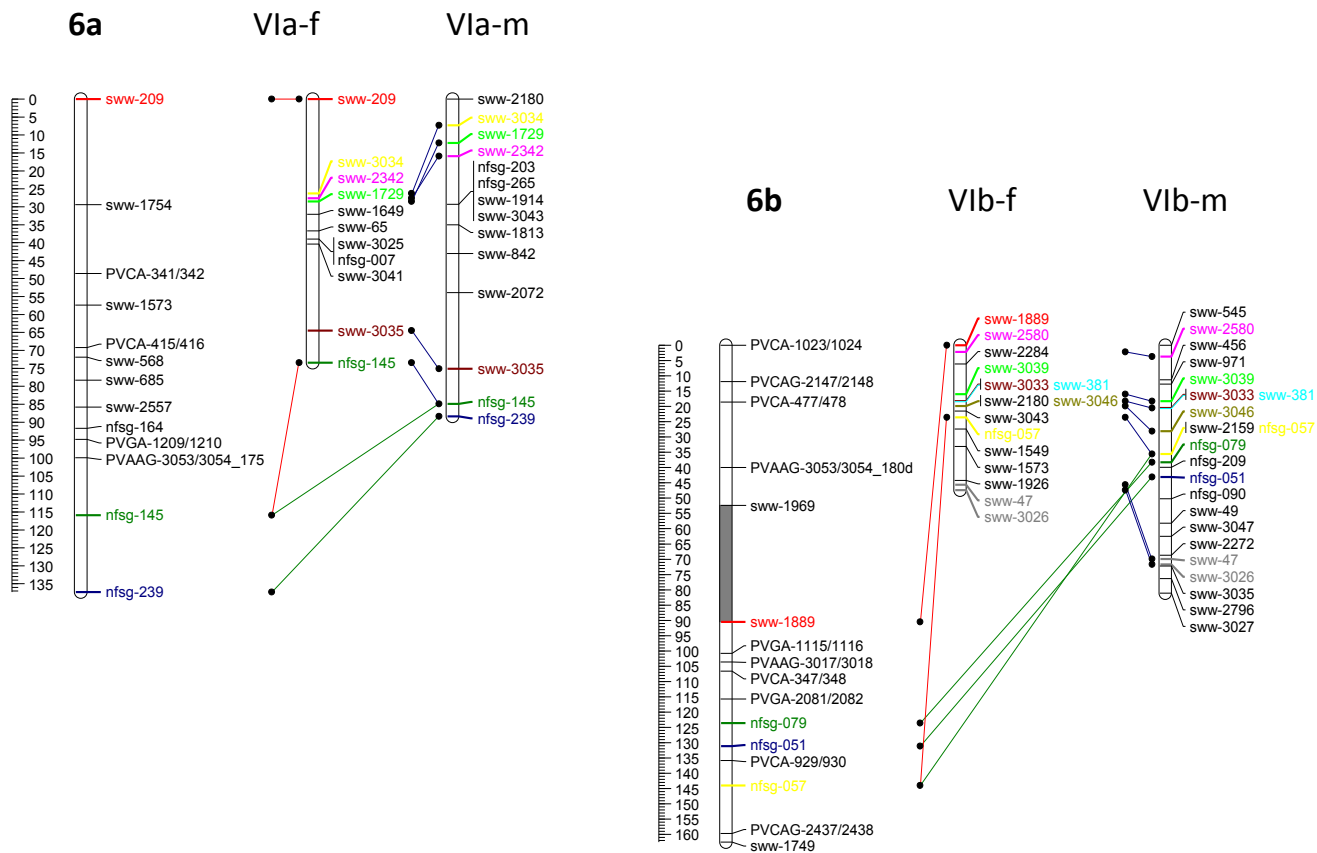

Figure S3-Continued

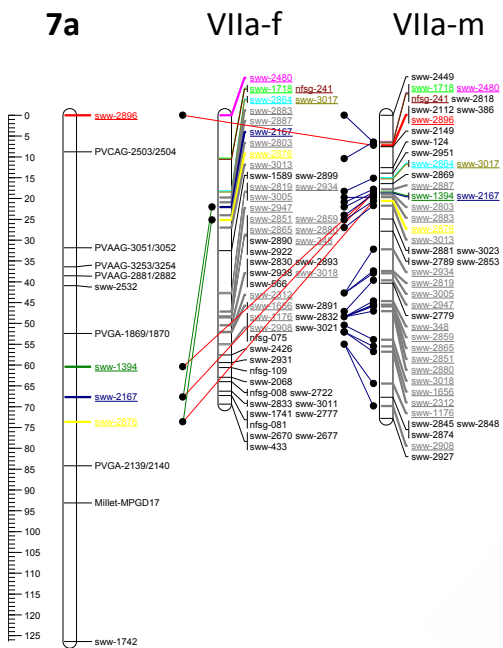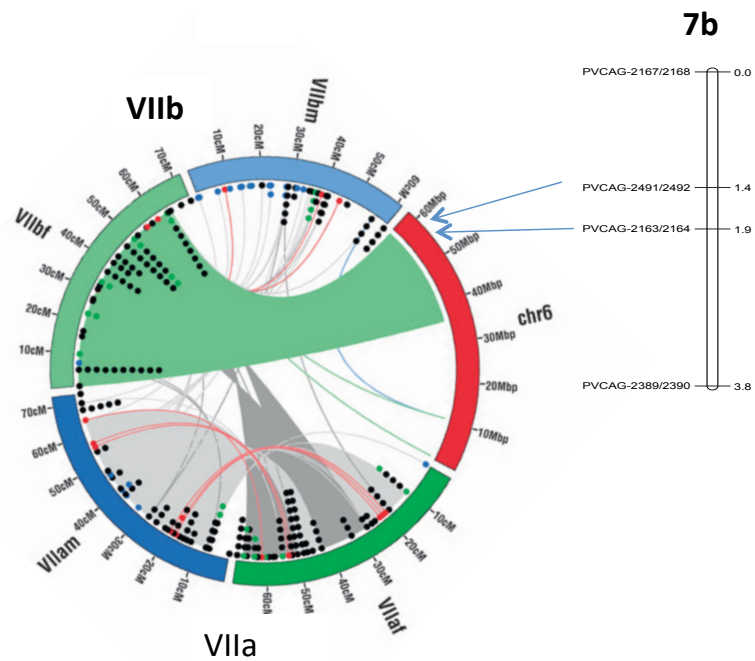

Figure S3-Continued

Circos image was taken from Okada *et al.* 2010 Genetics. Doi:10.1534/genetics.110.113910

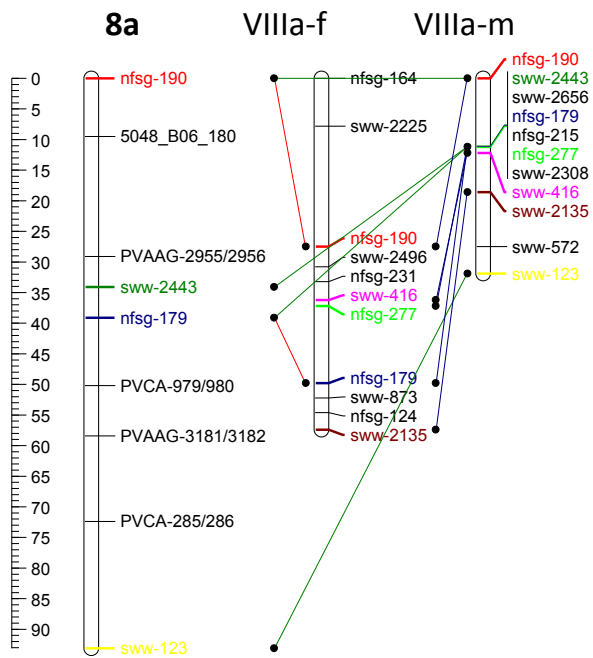

Figure S3-Continued

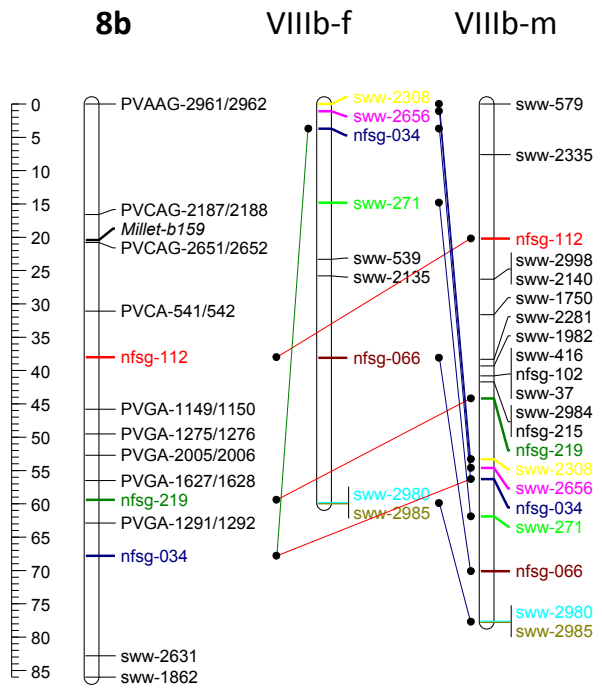



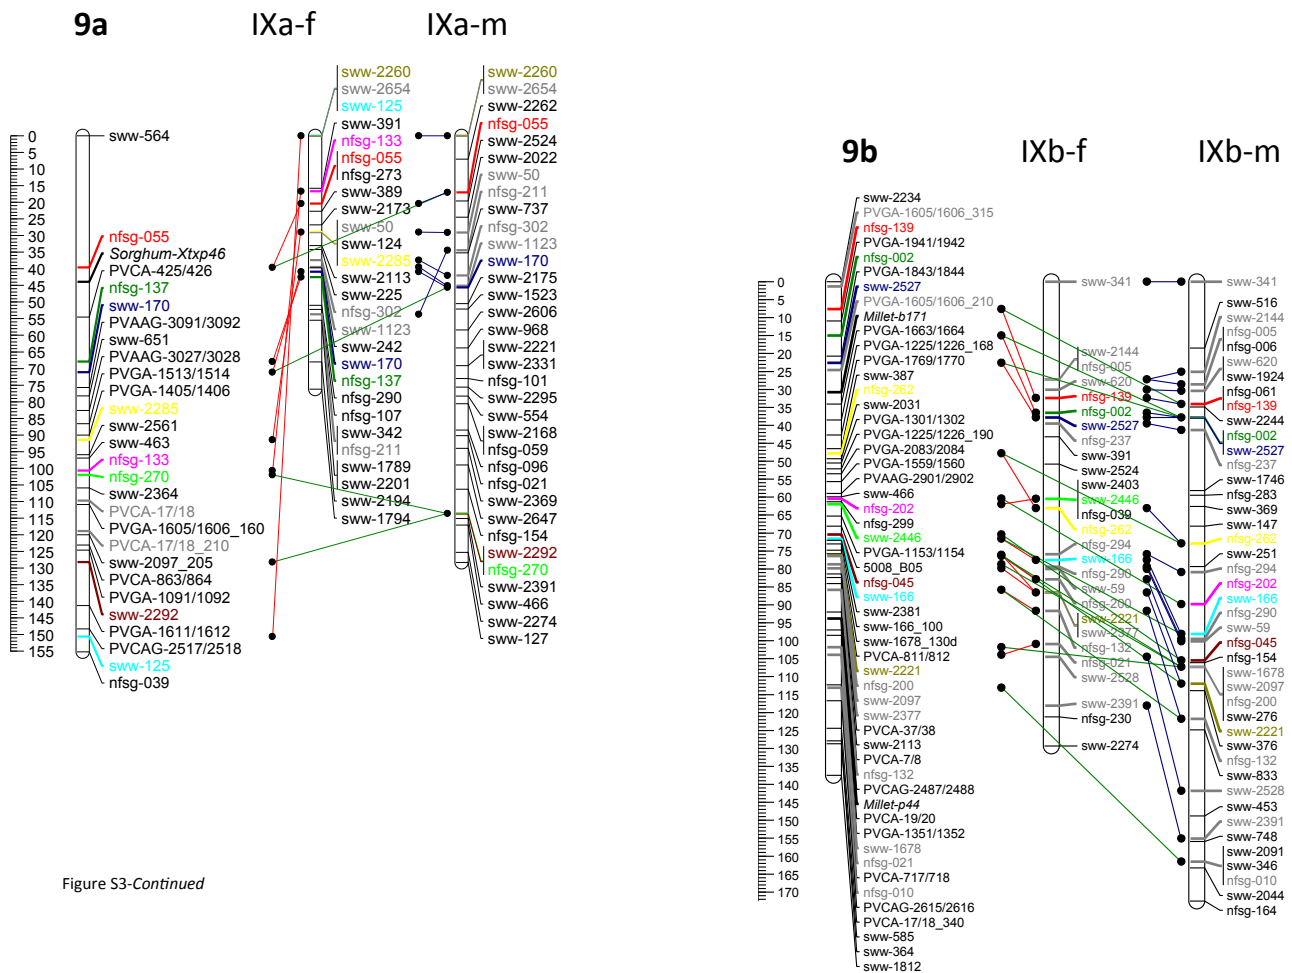

**Figure S3** Collinearity between this and published linkage map (Okada *et al.* 2010). The names of linkage groups (LGs) in this study are indicated with Arabic numbers in bold, and the designation of LGs and two subgenomes ('a' and 'b') is consistent with the reference map (Okada *et al.* 2010). The letter 'f' and 'm' at the end of reference LGs (Roman number) denotes female and male parent maps, respectively. To compare the two maps, the duplicated loci amplified from same markers in reference map and the band sizes were removed. All loci mapped with the same markers across LGs are highlighted with matching colors.
