# Supplementary material for: A High-Density Simple Sequence Repeat-Based Genetic Linkage Map of Switchgrass
Source: PubMed Central journal article supplement (PMC3291506; doi:10.1534/g3.111.001503), 2012-03-01
Supplement: supp_2.3.357_TableS1.pdf [file supp_2.3.357_TableS1.pdf]

**Table S1 Expected progeny phenotypes and segregation ratios for disomic and tetrasomic inheritance in a selfed population of a tetraploid switchgrass plant**

| Inheritance mode | Marker scoring types | Genotypes of two bands observed <sup>a</sup> | Theoretical genotypes of selfed progeny <sup>b</sup> | Expected selfed progeny band pattern | Expected progeny ratio |
|------------------|----------------------|----------------------------------------------|------------------------------------------------------|--------------------------------------|------------------------|
| Disomic          |                      | <i>AB</i>                                    | <i>1AA, 2AB, 1BB</i>                                 | a:ab:b                               | 1:2:1                  |
| Tetrasomic       | co-dominant          | <i>ABBB</i>                                  | <i>(1AABB,2ABBB),1BBBB</i>                           | ab:b                                 | 3:1                    |
|                  |                      | <i>AABB</i>                                  | <i>1AAAA,(8AAAAB,18AABB,8ABBB),1BBBB</i>             | a:ab:b                               | 1:34:1                 |
|                  |                      | <i>AAAB</i>                                  | <i>1AAAA,(2AAAAB,1AABB)</i>                          | a:ab                                 | 1:3                    |
| Disomic          |                      | <i>A_</i>                                    | <i>(1AA, 2A_ ), 1_ _</i>                             | presence:absence                     | 3:1                    |
| Tetrasomic       | dominant             | <i>A_ _ _</i>                                | <i>(1AA_ _ ,2A_ _ _ ),1_ _ _ _</i>                   | presence:absence                     | 3:1                    |
|                  |                      | <i>AA_ _</i>                                 | <i>(1AAAA,8AAA_ ,18AA_ _ ,8A_ _ _ ),1_ _ _ _</i>     | presence:absence                     | 35:1                   |
|                  |                      | <i>AAA_</i>                                  | <i>(1AAAA,2AAA_ ,1AA_ _ )</i>                        | presence:absence                     | all presence           |

<sup>a</sup> Italicized capital letters represent genotypes.

<sup>b</sup> The genotypes in parenthesis produce the same gel banding phenotypes.
