# Supplementary material for: A High-Density Simple Sequence Repeat-Based Genetic Linkage Map of Switchgrass
Source: PubMed Central journal article supplement (PMC3291506; doi:10.1534/g3.111.001503), 2012-03-01
Supplement: supp_2.3.357_TableS2.pdf [file supp_2.3.357_TableS2.pdf]

**Table S2 Detection of redundancy among published primers (Tobias *et al.* 2006, 2008; Wang *et al.* 2011) using bl2seq basic local alignment search tool (BLAST) (NCBI, Bethesda, MD)**

| Marker ID of Wang <i>et al.</i> (2011) | Marker ID of Okada <i>et al.</i> (2010) | SSR type | % Read (similarity) | Read length (bp) | E value  | Bit score <sup>b</sup> |
|----------------------------------------|-----------------------------------------|----------|---------------------|------------------|----------|------------------------|
| PVGA-1225/1226                         | NFSG005                                 | gSSR     | 100                 | 21               | 9.00E-08 | 39.9                   |
| PVGA-1901/1902                         | NFSG006                                 | gSSR     | 100                 | 22               | 6.00E-08 | 41.7                   |
| PVGA-1643/1644                         | NFSG066                                 | gSSR     | 100                 | 21               | 4.00E-09 | 39.9                   |
| PVGA-1419/1420                         | NFSG102                                 | gSSR     | 100                 | 20               | 2.00E-10 | 38.1                   |
| PVGA2-1329/1330                        | NFSG136                                 | gSSR     | 100                 | 20               | 7.00E-09 | 38.1                   |
|                                        | NFSG249                                 | gSSR     | 100                 | 20               | 5.00E-08 | 39.9                   |
| PVGA-1669/1670                         | NFSG187                                 | gSSR     | 100                 | 21               | 4.00E-08 | 39.9                   |
| PVGA-1627/1628                         | NFSG215                                 | gSSR     | 100                 | 21               | 2.00E-09 | 38.9                   |
| PVGA-1657/1658                         | NFSG243                                 | gSSR     | 100                 | 21               | 1.00E-08 | 30.7                   |
| PVGA-1867/1868                         | SWW2864                                 | eSSR     | 100                 | 20               | 2.30E-08 | 39.9                   |
| PVGA-2035/2036                         | SWW2881                                 | eSSR     | 100                 | 21               | 4.00E-08 | 39.9                   |
| PVGA-1295/1296                         | SWW2954                                 | eSSR     | 100                 | 21               | 7.00E-09 | 38.8                   |
| PVCAG-2245/2246                        | SWW3033                                 | eSSR     | 100                 | 21               | 2.10E-09 | 30.7                   |
| PVGA6-1793/1794                        | SWW2839                                 | eSSR     | 76                  | 16               | 4.00E-06 | 38.8                   |
| PVGA5-1697/1698                        | sww2845                                 | eSSR     | 100                 | 21               | 1.41E-09 | 38.8                   |
| PVCA- 985/986                          | SWW3043                                 | eSSR     | 100                 | 18               | 8.10E-07 | 38.1                   |
| sww1 <sup>a</sup>                      | 4821_A04                                | eSSR     | 100                 | 20               | 2.00E-09 | 38.1                   |
| sww842                                 | 4934_H04                                | eSSR     | 100                 | 20               | 1.00E-09 | 38.1                   |
| SWW35                                  | No reverse sequence hit in GenBank      | eSSR     |                     |                  |          |                        |
| NFSG028                                | Redundant with NFSG027                  | gSSR     |                     |                  |          |                        |

<sup>a</sup> The last four primer pairs are the comparison of primer pairs from same research group (Tobias *et al.* 2006, 2008; Okada *et al.* 2010)

<sup>b</sup> Note the bit score represents the normalized value that can be used to compare alignment scores from different searches
