# Supplementary material for: A High-Density Simple Sequence Repeat-Based Genetic Linkage Map of Switchgrass
Source: PubMed Central journal article supplement (PMC3291506; doi:10.1534/g3.111.001503), 2012-03-01
Supplement: supp_2.3.357_TableS3.pdf [file supp_2.3.357_TableS3.pdf]

**Table S3 Presentation of identical bridge markers in the linkage groups (LGs) of this map and a previous study (Okada *et al.* 2010)**

| LGs in this study | Corresponding LGs and subgenome designation of Okada <i>et al.</i> 2010 | No. of bridge markers | LGs and alternate subgenome designation of Okada <i>et al.</i> 2010 | No. of bridge markers |
|-------------------|-------------------------------------------------------------------------|-----------------------|---------------------------------------------------------------------|-----------------------|
| 1a                | Ia                                                                      | 5                     | Ib                                                                  | 0                     |
| 1b                | Ib                                                                      | 10                    | Ia                                                                  | 5                     |
| 2a                | IIa                                                                     | 8                     | IIb                                                                 | 2                     |
| 2b                | IIb                                                                     | 8                     | IIa                                                                 | 1                     |
| 3a                | IIIa                                                                    | 6                     | IIIb                                                                | 1                     |
| 3b                | IIIb                                                                    | 7                     | IIIa                                                                | 0                     |
| 4a <sup>a</sup>   | IVa                                                                     | 4                     | IVb                                                                 | 1                     |
| 4b                | IVb                                                                     | 3                     | IVa                                                                 | 2                     |
| 5a                | Va                                                                      | 3                     | Vb                                                                  | 0                     |
| 5b                | Vb                                                                      | 8                     | Va                                                                  | 2                     |
| 6a                | VIa                                                                     | 3                     | VIb                                                                 | 1                     |
| 6b                | VIb                                                                     | 4                     | VIa                                                                 | 0                     |
| 7a                | VIIa                                                                    | 4                     | VIIb                                                                | 0                     |
| 7b                | VIIb                                                                    | 0                     | VIIa                                                                | 0                     |
| 8a                | VIIIa                                                                   | 4                     | VIIIb                                                               | 0                     |
| 8b                | VIIIb                                                                   | 3                     | VIIIa                                                               | 0                     |
| 9a                | IXa                                                                     | 8                     | IXb                                                                 | 1                     |
| 9b                | IXb                                                                     | 16                    | Ixa                                                                 | 2                     |
| <b>Total</b>      |                                                                         | <b>102</b>            |                                                                     | <b>15</b>             |

<sup>a</sup>Two bridge markers (nfs-054 and sw-1918) were shared by both LG 4a and 4b.
